# Supplementary material for: Use of different RT-QuIC substrates for detecting CWD prions in the brain of Norwegian cervids
Source: PubMed Central journal article supplement (PMC6901582; doi:10.1038/s41598-019-55078-x), 2019-12-09
Supplement: 41598_2019_55078_MOESM1_ESM.pdf [file 41598_2019_55078_MOESM1_ESM.pdf]

**Use of different RT-QuIC substrates for detecting CWD prions in the brain of Norwegian cervids**

Edoardo Bistaffa, Tram Thu Vuong, Federico Angelo Cazzaniga, Linh Tran, Giulia Salzano, Giuseppe Legname, Giorgio Giaccone, Sylvie L. Benestad, Fabio Moda

# Supplementary Fig. S1

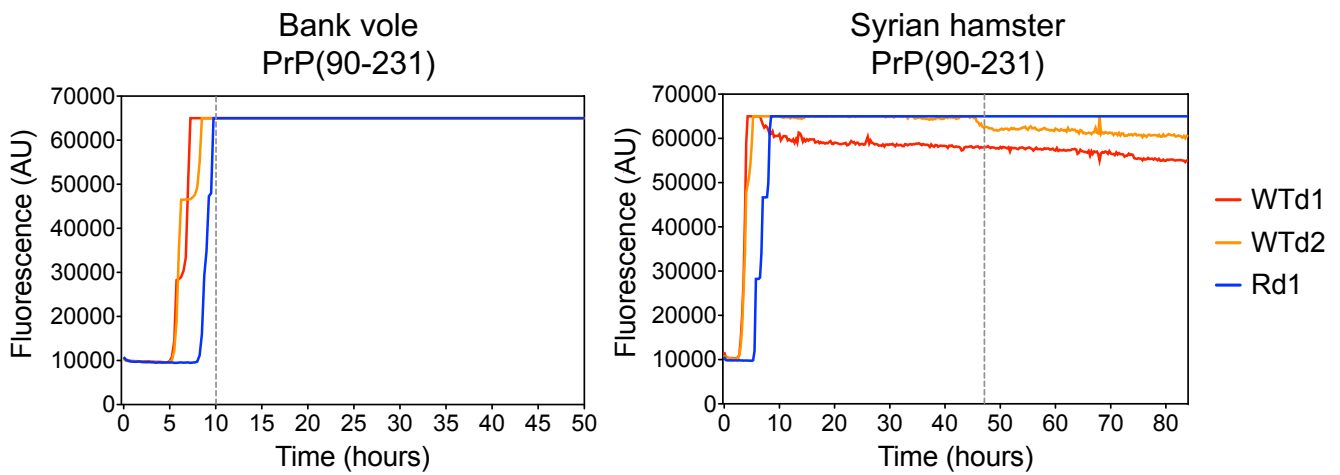

**Supplementary Fig. S1. RT-QuIC results of brain from CWD affected Norwegian and North American deer.** Brain homogenates were diluted at  $10^{-6}$  (v/v) and analyzed by RT-QuIC using either recombinant bank vole or Syrian hamster truncated PrP. Average ThT fluorescence values were plotted against time. WTd: white tailed deer (North America); Rd: red deer.
